# Supplementary material for: Combined histone deacetylase inhibition and tamoxifen induces apoptosis in tamoxifen-resistant breast cancer models, by reversing Bcl-2 overexpression
Source: Springer Nature journal article supplement (doi:10.1186/s13058-015-0533-z), 2015-02-24

**Figure S1: TAMR<sup>M</sup> cells form tumors in mice in absence of an estradiol pellet.**

TAMR<sup>M</sup> cells were grown in phenol-red free media supplemented with charcoal dextran stripped serum for 7 days before implanting subcutaneously in two mice for tumor formation. Tumor growth in absence of estradiol pellet was evaluated over time by caliper measurement and calculating volume as  $0.5 \text{ (tumor length} \times \text{tumor width}^2)$ .

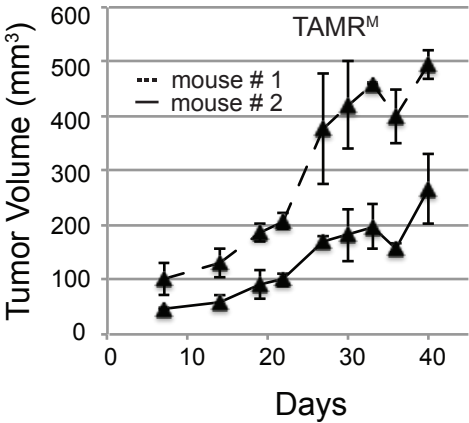

Supplement: MOESM1 [file 9781364]
