# Supplementary material for: Combined histone deacetylase inhibition and tamoxifen induces apoptosis in tamoxifen-resistant breast cancer models, by reversing Bcl-2 overexpression
Source: Springer Nature journal article supplement (doi:10.1186/s13058-015-0533-z), 2015-02-24

**Figure S2: PCI-24781 induces cell death in TAMR<sup>M</sup> cells genetically silenced for ER.**

TAMR<sup>M</sup> cells were transfected with ESR1 directed siRNA and subsequently treated with PCI-24781 for 72 hours. Cells were then evaluated for viability (A) and PARP cleavage (B).

**A**

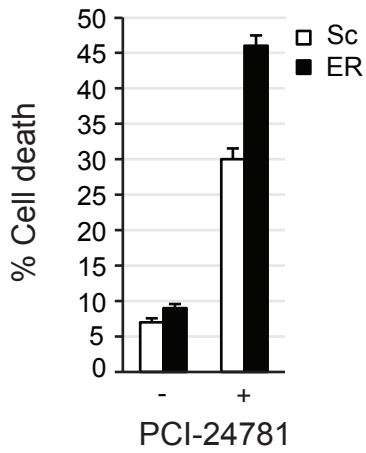

**B**

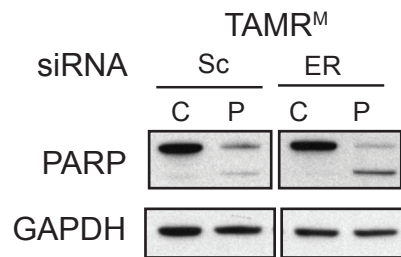

Supplement: MOESM2 [file 9781364]
