# Supplementary material for: Combined histone deacetylase inhibition and tamoxifen induces apoptosis in tamoxifen-resistant breast cancer models, by reversing Bcl-2 overexpression
Source: Springer Nature journal article supplement (doi:10.1186/s13058-015-0533-z), 2015-02-24

**Figure S3: The HDAC inhibitor PCI-24781 negatively regulates ER mRNA.**

TAMR<sup>M</sup> cells were treated with either (A) increasing concentrations of the HDAC inhibitor PCI-24781 for 24 hours or (B) with 200 nM of PCI-24781 for 0, 2, 4, 10 and 24 hours, after which ER mRNA expression was evaluated.

**A**

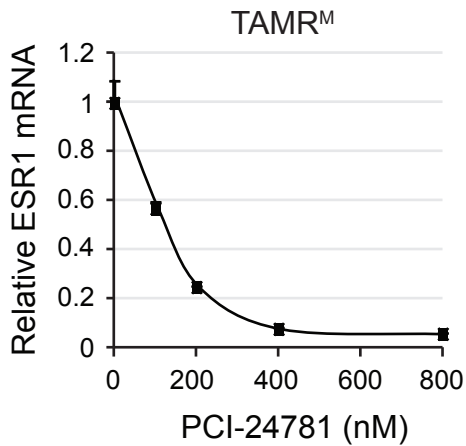

**B**

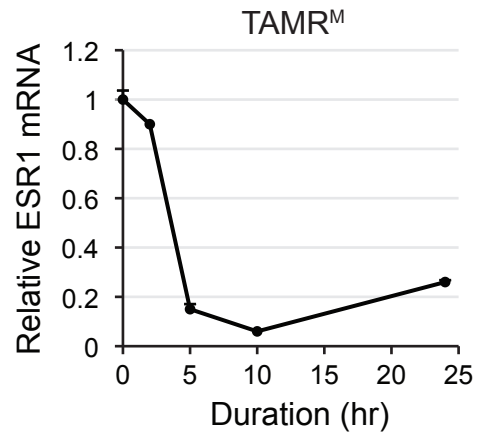

Supplement: MOESM3 [file 9781364]
