# Supplementary material for: Combined histone deacetylase inhibition and tamoxifen induces apoptosis in tamoxifen-resistant breast cancer models, by reversing Bcl-2 overexpression
Source: Springer Nature journal article supplement (doi:10.1186/s13058-015-0533-z), 2015-02-24

**Figure S4: PCI-24781 reduces BCL-2 mRNA in a dose dependent manner.**

TAMR<sup>M</sup> cells were treated with increasing concentrations of PCI-24781 (0, 200, 400, 800 nM) for 24 hours and BCL-2 mRNA expression was evaluated.

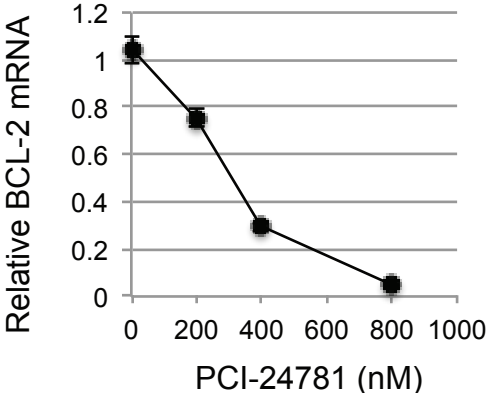

Supplement: MOESM4 [file 9781364]
