# Supplementary material for: Combined histone deacetylase inhibition and tamoxifen induces apoptosis in tamoxifen-resistant breast cancer models, by reversing Bcl-2 overexpression
Source: Springer Nature journal article supplement (doi:10.1186/s13058-015-0533-z), 2015-02-24

**Figure S5: TAMR<sup>M</sup> cells exhibit decreased sensitivity to apoptotic stress as compared to MCF7.**

MCF7 and TAMR<sup>M</sup> cells were treated with increasing concentrations of (A) Tam and (B) doxorubicin for 72 hours and evaluated for cell death by trypan blue dye exclusion assay.

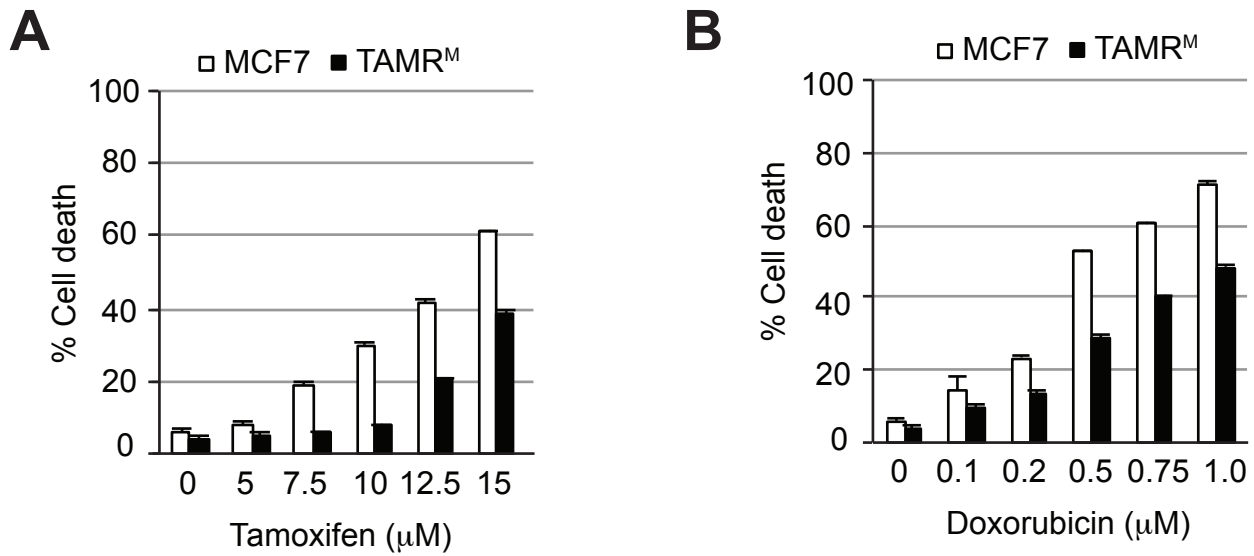

Supplement: MOESM5 [file 9781364]
